# Supplementary material for: A method for topological analysis of high nuclearity coordination clusters and its application to Mn coordination compounds
Source: Royal Society of Chemistry journal article supplement (doi:10.1039/c2dt12263d), 2012-01-01
Supplement: c2dt12263d.pdf [file c2dt12263d.pdf]

## Supporting Information

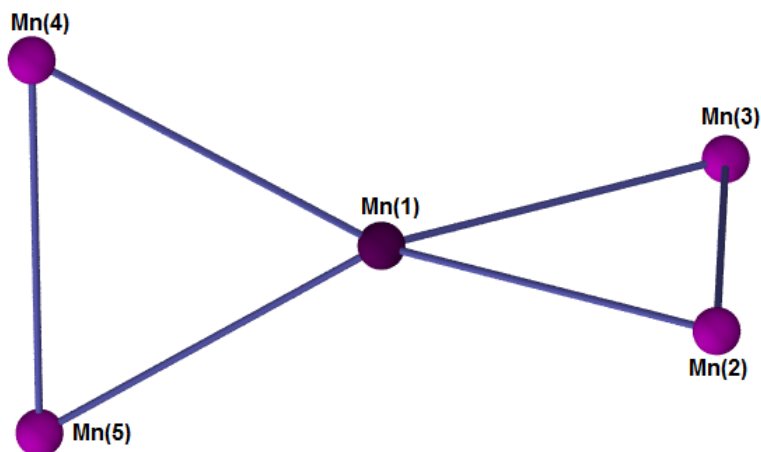

Figure S1. The motif **2,4M5-1**.

After our paper was accepted we decided to update our results to the most recent CSD, so we found that the most popular motif in  $Mn_5$  chemistry consists of 12 examples, ranked among the six most frequent motifs found in our survey. It has the **2,4M5-1** topology that can be described by two triangles sharing one node (Figure S1). The earliest example found in our survey is formulated as  $[Mn^{II}_5(L)_2(OAc)_2(ClO_4)_2](ClO_4)_2$  (TEZPOD), where  $H_2L$  is a macrocyclic ligand formed by a [2 + 2] condensation of 2,6-diacetylpyridine and 1,3-diaminopropan-2-ol. Magnetic studies of this compound revealed that the complex exhibits weak antiferromagnetism.

TEZPOD: S. Brooker, V. McKee and T. Metcalfe, *Inorg. Chim. Acta*, **1996**, 246, 171
